# Supplementary material
Source: PubMed Central journal article supplement (PMC4348773)
Supplement: supp_pp.114.253815_253815TableS3S5andFig_S1.pdf [file supp_pp.114.253815_253815TableS3S5andFig_S1.pdf]

**Table S3. List of auxin related genes that are up-regulated in *TAPG4::antisense KD1* plants**

| <b>Accession</b> | <b>Description</b>                                | <b>Ratio (<i>TAPG4::antisense KD1</i>/WT)</b> |
|------------------|---------------------------------------------------|-----------------------------------------------|
| SL_NP000208      | Aux/IAA2                                          | 4.4                                           |
| SL_TC201517      | Auxin-induced protein PCNT115                     | 4.1                                           |
| SL_TC194455      | Auxin-induced protein PGNT1/PCNT110               | 3.0                                           |
| SL_TC208817      | Auxin-induced protein PGNT1/PCNT110               | 2.7                                           |
| SL_TC202903      | SAUR family protein                               | 2.7                                           |
| SL_BI922613      | Auxin-induced protein PGNT1/PCNT110               | 2.6                                           |
| SL_TC192282      | GH3.3                                             | 2.6                                           |
| SL_TC206415      | SAUR family protein                               | 2.5                                           |
| SL_TC206830      | Auxin-induced protein PCNT103                     | 2.4                                           |
| SL_TC194204      | 2,4-D inducible glutathione S-transferase         | 2.3                                           |
| SL_TC204329      | 2,4-D inducible glutathione S-transferase         | 2.3                                           |
| PH_TC2384        | Auxin-induced protein 22E                         | 2.2                                           |
| SL_TC202749      | Auxin and ethylene responsive GH3-like protein    | 2.1                                           |
| SL_TC193041      | Auxin-regulated dual specificity cytosolic kinase | 2.0                                           |
| SL_ES895408      | Auxin-induced protein PCNT103                     | 2.0                                           |

|             |                                                      |     |
|-------------|------------------------------------------------------|-----|
| SL_TC215273 | Auxin-regulated protein                              | 2.0 |
| SL_BP901371 | Aquaglyceroporin; tonoplast intrinsic protein (TIPa) | 2.0 |
| SL_TC207224 | Auxin response factor 2                              | 2.0 |
| SL_TC198378 | Aux/IAA4                                             | 2.0 |

**Table S4. List of auxin related genes that are down-regulated in *TAPG4::antisense KD1* plants**

| <b>Accession</b> | <b>Description</b>                      | <b>Ratio (<i>TAPG4::antisense KD1</i>/WT)</b> |
|------------------|-----------------------------------------|-----------------------------------------------|
| SL_TC214499      | Auxin-induced protein 5NG4              | 0.5                                           |
| SL_TZXJ369TF     | Auxin response factor 5                 | 0.5                                           |
| SL_BF097763      | Auxin response factor 8                 | 0.5                                           |
| SL_TC197872      | PIN-like 3                              | 0.5                                           |
| SL_DB726452      | Auxin-induced protein                   | 0.5                                           |
| NM_001247676     | Auxin response factor 19                | 0.5                                           |
| SL_TC192465      | Auxin response factor 3                 | 0.4                                           |
| SL_TC202675      | Auxin-regulated protein                 | 0.4                                           |
| SL_AW929186      | IAA-amino acid hydrolase ILR1 precursor | 0.3                                           |
| SL_AI781477      | IAA-amino acid hydrolase ILR1 precursor | 0.3                                           |

**Table S5. Primers used for Quantitative PCR analysis.**

| Annotation                | Primer set              |                               |
|---------------------------|-------------------------|-------------------------------|
|                           | Forward primer (5'-3')  | Reverse primer (5'-3')        |
| KD1                       | GCTCACTCACAATGGATCAACC  | GATGGAGTGGAAGTAGAAGTAGGAAGTTC |
| PIN-likes 3 (SL_TC197872) | GAGGCTCCATTGCATGTCATC   | AACCAACCCAAAATGGCGTG          |
| PIN9 (HQ127075)           | TCCTGAGGCATCACCATAACA   | TCATTGCTTCCAACAATCCA          |
| IAA2 (SL_NP000208)        | TCGATCCTATCGAAAGAACATTT | ACATCCGTTGTATCCATCTGTTT       |
| IAA4 (SL_TC198378)        | CTTGTCGGTGATGTCCCCTG    | TCTGCTCCGACACTTTTCCA          |
| SAUR (SL_TC202903)        | AGAGAAGGCAAGTGTGGTGC    | AGAGAAGGCAAGTGTGGTGC          |
| GH3.3 (SL_TC192282)       | ACAGGTCACAGGGTTTCAACA   | GGAATGGTTTTGGTGTCCGC          |
| ARF5 (SL_TZXJ369TF)       | AATGCAATCTTTTGCAGAATAGC | CAGTAGGCGATAAAAATTCTGATG      |
| ARF19 (NM_001247676)      | GGCATGCTCTCCAGCTATGA    | CCTACTGCACCACGCTTGTA          |

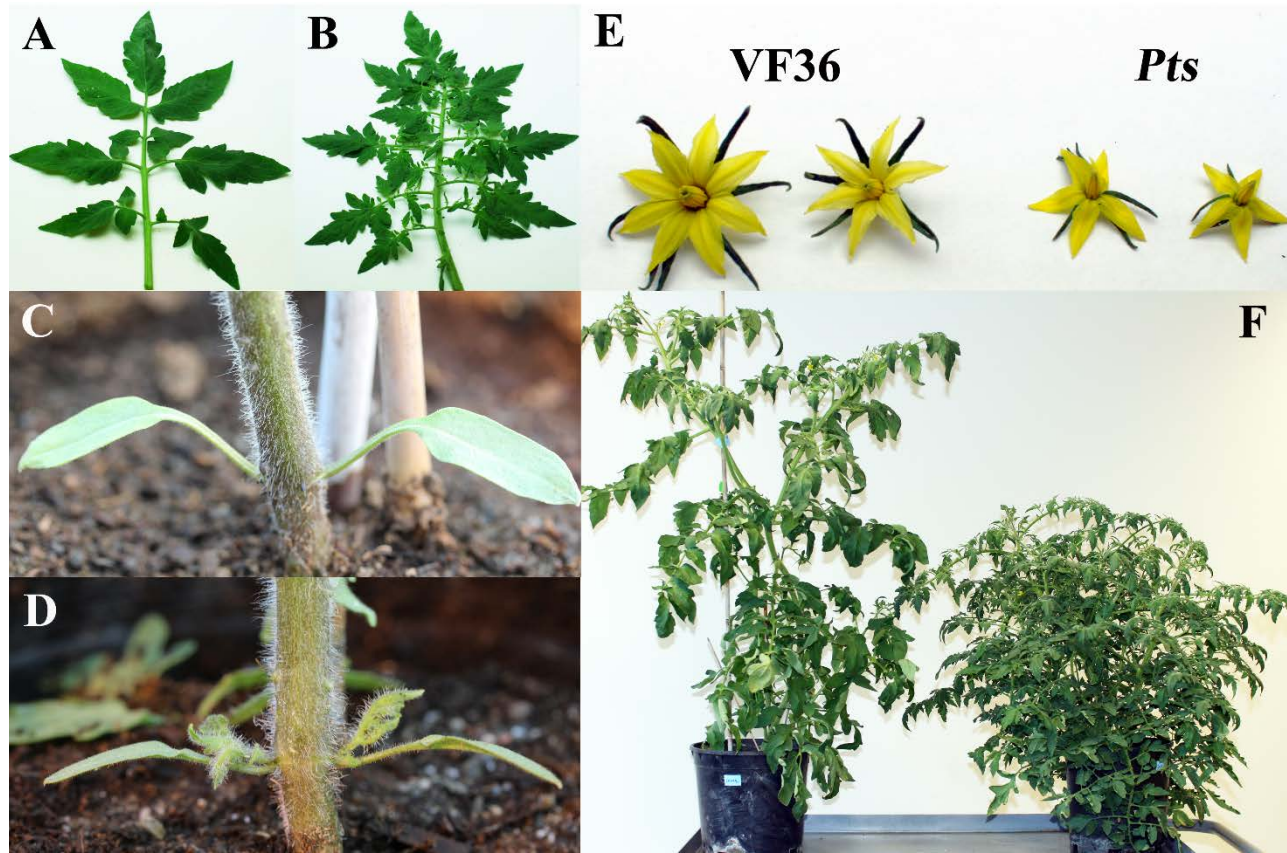

**Figure S1. Phenotypes of the *KDI* semi-dominant mutant *PETROSELINUM* (*Pts*).** (A) Leaf from wild type tomato (VF36); (B) leaf from *Pts* mutant; (C) Cotyledonary axils of VF36 plants and (D) *Pts* plants at day 30; (E) flowers from VF36 and *Pts* plants; (F) 70 day plants of VF36 (left) and *Pts* (right).
